# Supplementary material for: Eco-Geographical Diversification of Bitter Taste Receptor Genes (TAS2Rs) among Subspecies of Chimpanzees (Pan troglodytes)
Source: PubMed Central journal article supplement (PMC3420883; doi:10.1371/journal.pone.0043277), 2012-08-16
Supplement: pone.0043277.s002.pdf [file pone.0043277.s002.pdf]

**(A)**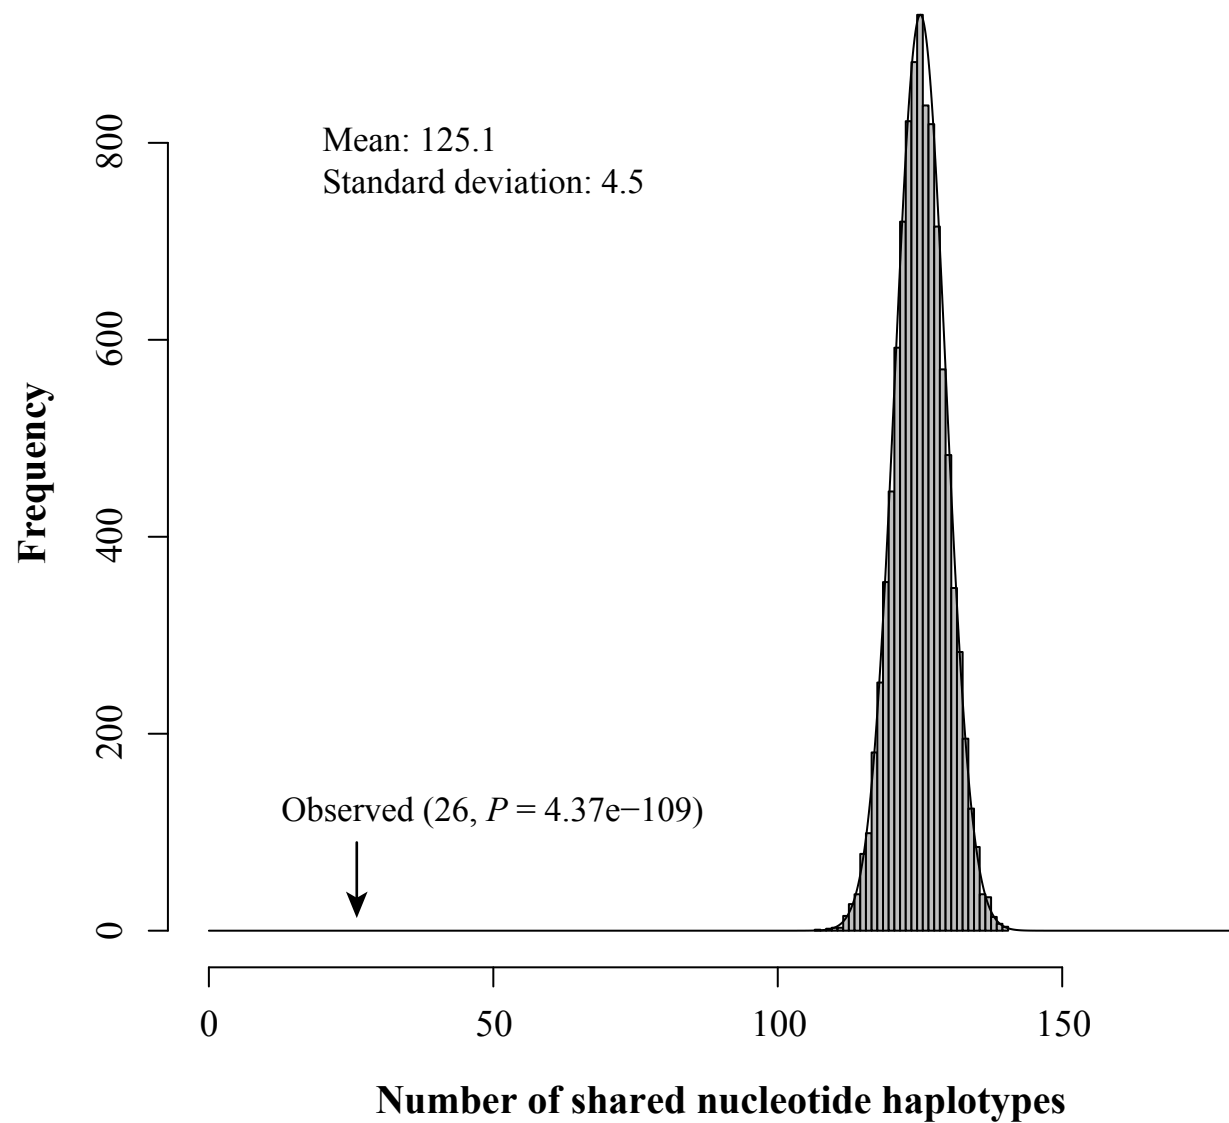**(B)**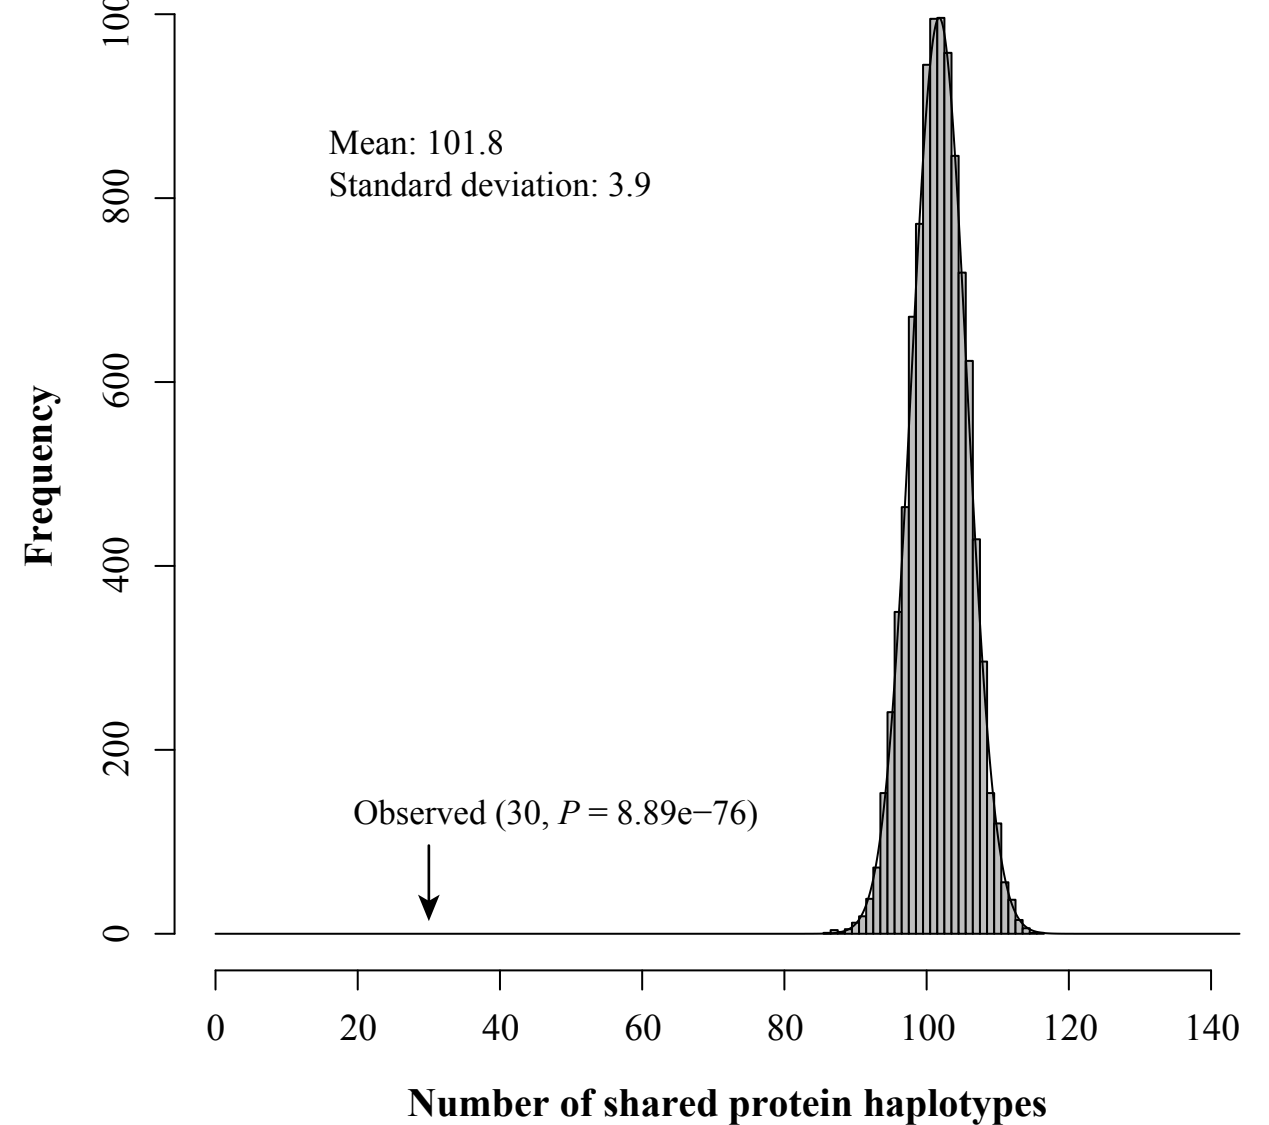

**Figure S2. Monte Carlo simulations to reconstruct the haplotype distribution.** A histogram shows simulated distribution of a total expected number of shared haplotypes between western and eastern chimpanzees in the 28 *cTAS2Rs*, assuming no differentiation of the 2 populations, given the sampling number of chromosomes (92 and 20, respectively) and the observed haplotypes with mean frequencies for the total metapopulation in each *cTAS2R* under 10,000 replicates. The probability that shared haplotypes were sampled in the observed number or less was estimated based on a fitted Gaussian distribution shown as a line graph. (A) Nucleotide haplotypes. (B) Protein haplotypes.
