# Supplementary material for: Eco-Geographical Diversification of Bitter Taste Receptor Genes (TAS2Rs) among Subspecies of Chimpanzees (Pan troglodytes)
Source: PubMed Central journal article supplement (PMC3420883; doi:10.1371/journal.pone.0043277), 2012-08-16
Supplement: pone.0043277.s003.pdf [file pone.0043277.s003.pdf]

**Table S1.** Genotypes of subjects in this study.

| Local ID | Subspecies | Genotype of <i>cTAS2R</i> |     |     |     |     |     |     |     |     |     |     |     |     |     |     |     |     |     |     |     |     |     |     |     |     |     |     |     |     |
|----------|------------|---------------------------|-----|-----|-----|-----|-----|-----|-----|-----|-----|-----|-----|-----|-----|-----|-----|-----|-----|-----|-----|-----|-----|-----|-----|-----|-----|-----|-----|-----|
|          |            | 1                         | 2   | 3   | 4   | 5   | 7   | 8   | 9   | 10  | 13  | 14  | 16  | 19  | 20  | 30  | 31  | 38  | 39  | 40  | 41  | 42  | 43  | 45  | 46  | 50  | 60  | 62  | 64  |     |
| 436      | Western    | 1,1                       | 1,1 | 1,2 | 1,2 | 1,1 | 1,1 | 1,2 | 1,2 | 1,1 | 1,2 | 1,1 | 1,1 | 1,1 | 1,2 | 1,2 | 1,2 | 1,1 | 1,2 | 1,1 | 1,1 | 1,1 | 1,2 | 1,1 | 1,2 | 1,2 | 1,2 | 1,2 | 1,1 |     |
| 437      | Western    | 1,1                       | 2,3 | 1,2 | 1,2 | 1,1 | 1,2 | 1,2 | 1,2 | 1,1 | 1,2 | 1,1 | 1,1 | 1,1 | 1,2 | 2,3 | 1,1 | 1,1 | 1,2 | 1,1 | 1,1 | 1,1 | 1,1 | 1,1 | 1,1 | 1,2 | 1,3 | 2,3 | 1,1 |     |
| 435      | Western    | 1,2                       | 1,2 | 2,3 | 2,2 | 1,1 | 1,1 | 1,1 | 1,1 | 1,1 | 1,3 | 1,2 | 1,1 | 1,1 | 1,3 | 3,3 | 1,2 | 1,2 | 1,1 | 1,1 | 1,1 | 1,2 | 2,3 | 1,2 | 2,3 | 1,3 | 1,1 | 1,1 | 1,2 |     |
| 434      | Western    | 1,2                       | 2,3 | 1,1 | 1,1 | 1,2 | 1,1 | 1,2 | 1,2 | 1,1 | 1,1 | 1,3 | 1,1 | 1,1 | 3,4 | 1,3 | 1,3 | 1,1 | 1,2 | 1,1 | 1,1 | 1,2 | 1,3 | 2,3 | 1,3 | 1,3 | 2,3 | 1,1 | 1,2 |     |
| 274      | Western    | 1,2                       | 2,3 | 1,2 | 1,2 | 1,1 | 1,1 | 1,2 | 1,2 | 1,1 | 4,4 | 1,1 | 1,1 | 1,2 | 2,2 | 1,3 | 1,4 | 1,1 | 1,1 | 1,1 | 1,1 | 1,1 | 1,1 | 1,1 | 1,4 | 1,1 | 2,2 | 1,1 | 2,2 | 1,1 |
| 432      | Western    | 1,1                       | 2,3 | 3,3 | 2,2 | 1,1 | 1,1 | 1,1 | 1,1 | 1,1 | 1,3 | 1,2 | 1,2 | 1,1 | 1,3 | 3,3 | 1,2 | 2,2 | 1,1 | 1,1 | 1,1 | 1,2 | 2,3 | 1,2 | 1,3 | 1,3 | 3,4 | 1,1 | 1,2 |     |
| 193      | Western    | 1,2                       | 1,1 | 1,1 | 1,1 | 1,1 | 1,1 | 1,2 | 1,2 | 1,1 | 1,1 | 1,2 | 1,2 | 1,1 | 1,4 | 3,3 | 1,2 | 1,3 | 1,1 | 1,1 | 1,1 | 1,2 | 2,4 | 1,5 | 1,1 | 1,1 | 1,3 | 1,1 | 1,3 |     |
| 110      | Western    | 1,1                       | 3,3 | 1,2 | 1,2 | 1,1 | 1,1 | 1,2 | 1,2 | 1,1 | 4,4 | 1,2 | 1,1 | 1,1 | 2,3 | 1,3 | 1,3 | 1,1 | 1,1 | 1,1 | 1,2 | 1,2 | 3,5 | 2,4 | 1,3 | 2,3 | 1,3 | 1,2 | 1,2 |     |
| 132      | Western    | 1,1                       | 2,2 | 2,3 | 2,2 | 1,2 | 1,2 | 1,1 | 1,1 | 1,1 | 1,1 | 2,2 | 1,2 | 1,2 | 3,3 | 2,4 | 1,2 | 1,1 | 1,1 | 1,1 | 1,1 | 1,3 | 2,3 | 1,2 | 1,4 | 1,2 | 1,2 | 1,2 | 1,2 |     |
| 119      | Western    | 1,2                       | 1,3 | 3,3 | 2,2 | 1,1 | 1,1 | 1,2 | 1,2 | 1,1 | 1,1 | 2,3 | 1,1 | 1,2 | 2,3 | 3,3 | 1,4 | 1,2 | 1,1 | 1,1 | 1,1 | 1,2 | 3,5 | 1,2 | 1,3 | 2,3 | 1,3 | 1,1 | 2,4 |     |
| 131      | Western    | 1,1                       | 2,2 | 3,3 | 2,2 | 1,1 | 1,1 | 1,2 | 1,2 | 1,1 | 1,5 | 1,2 | 1,2 | 1,1 | 4,4 | 1,3 | 1,1 | 1,2 | 1,2 | 1,1 | 1,1 | 1,1 | 1,4 | 1,5 | 1,1 | 1,1 | 1,3 | 1,2 | 1,3 |     |
| 143      | Western    | 1,1                       | 2,2 | 1,2 | 1,2 | 1,1 | 1,2 | 1,1 | 1,1 | 1,1 | 1,1 | 2,3 | 1,1 | 1,1 | 1,3 | 3,3 | 2,3 | 1,2 | 1,1 | 1,1 | 1,1 | 1,2 | 2,3 | 1,2 | 1,3 | 1,3 | 1,3 | 1,1 | 1,2 |     |
| 146      | Western    | 1,1                       | 2,3 | 1,1 | 1,1 | 1,1 | 1,1 | 2,3 | 1,2 | 1,1 | 1,1 | 1,2 | 1,2 | 1,1 | 1,4 | 3,3 | 1,2 | 1,1 | 1,1 | 1,1 | 1,1 | 1,1 | 2,4 | 1,5 | 1,1 | 1,1 | 2,3 | 1,1 | 1,3 |     |
| 449      | Western    | 1,2                       | 1,3 | 1,3 | 1,2 | 1,1 | 1,1 | 1,3 | 1,1 | 1,1 | 1,1 | 1,1 | 1,2 | 1,1 | 4,4 | 1,3 | 1,1 | 1,2 | 1,1 | 1,1 | 1,1 | 1,1 | 2,4 | 1,5 | 1,1 | 1,1 | 1,4 | 1,1 | 1,3 |     |
| 135      | Western    | 2,2                       | 1,2 | 1,3 | 1,2 | 1,2 | 1,1 | 2,3 | 1,2 | 1,1 | 1,2 | 1,1 | 1,1 | 1,1 | 1,4 | 1,3 | 1,2 | 1,2 | 1,1 | 1,1 | 1,1 | 1,4 | 1,2 | 1,1 | 1,1 | 1,1 | 3,3 | 1,1 | 1,1 |     |
| 448      | Western    | 1,2                       | 2,3 | 1,3 | 1,2 | 1,1 | 1,1 | 1,1 | 1,1 | 1,1 | 1,1 | 1,2 | 1,1 | 1,2 | 1,2 | 3,3 | 2,4 | 1,1 | 1,1 | 1,1 | 1,2 | 1,3 | 2,3 | 1,2 | 1,5 | 1,2 | 3,3 | 1,1 | 1,2 |     |
| 268      | Western    | 1,2                       | 2,2 | 1,3 | 1,2 | 1,1 | 1,1 | 2,2 | 2,2 | 1,1 | 1,1 | 2,2 | 1,1 | 1,1 | 4,4 | 3,3 | 1,1 | 1,2 | 1,1 | 1,1 | 1,2 | 1,1 | 4,4 | 5,5 | 1,1 | 1,1 | 1,1 | 1,1 | 3,3 |     |
| 451      | Western    | 1,1                       | 1,2 | 1,1 | 1,1 | 1,1 | 1,1 | 1,1 | 1,1 | 1,2 | 1,2 | 1,1 | 1,1 | 1,1 | 1,2 | 1,3 | 1,2 | 1,4 | 1,1 | 1,1 | 1,1 | 1,1 | 1,1 | 1,2 | 1,1 | 1,1 | 1,2 | 1,1 | 1,2 | 1,1 |
| 445      | Western    | 1,1                       | 1,2 | 1,3 | 1,2 | 1,2 | 1,1 | 1,1 | 1,1 | 1,1 | 1,1 | 1,1 | 1,2 | 1,2 | 2,2 | 3,3 | 1,4 | 1,1 | 1,1 | 1,1 | 1,1 | 1,3 | 2,3 | 1,2 | 1,4 | 1,2 | 1,1 | 1,2 | 1,2 |     |
| 159      | Western    | 1,1                       | 1,3 | 3,3 | 2,2 | 1,1 | 1,2 | 1,1 | 1,1 | 1,1 | 1,3 | 2,2 | 1,1 | 1,1 | 1,1 | 3,3 | 2,2 | 1,1 | 1,1 | 1,1 | 1,1 | 1,1 | 2,2 | 1,1 | 1,2 | 1,1 | 1,3 | 1,2 | 1,1 |     |
| 170      | Western    | 1,1                       | 1,2 | 2,3 | 2,2 | 1,1 | 1,1 | 1,1 | 1,1 | 1,1 | 1,6 | 4,4 | 1,1 | 1,1 | 1,4 | 1,3 | 1,2 | 1,1 | 1,2 | 1,1 | 1,1 | 1,4 | 1,2 | 1,1 | 1,1 | 1,1 | 1,3 | 1,2 | 1,1 |     |
| 454      | Western    | 1,2                       | 2,2 | 1,1 | 1,1 | 1,1 | 1,1 | 1,1 | 1,1 | 1,1 | 1,3 | 4,4 | 1,1 | 1,1 | 1,4 | 3,3 | 2,2 | 1,1 | 1,1 | 1,1 | 1,1 | 1,1 | 1,2 | 1,1 | 1,1 | 1,4 | 3,3 | 1,1 | 1,4 |     |
| 269      | Western    | 1,2                       | 3,3 | 1,3 | 1,2 | 1,1 | 1,1 | 1,2 | 1,2 | 1,1 | 2,3 | 1,1 | 1,2 | 1,2 | 2,4 | 1,3 | 1,4 | 1,2 | 1,1 | 1,1 | 1,1 | 1,3 | 1,3 | 1,2 | 1,4 | 1,2 | 3,3 | 1,1 | 1,2 |     |
| 457      | Western    | 1,2                       | 1,2 | 1,3 | 1,2 | 1,1 | 1,2 | 1,1 | 1,1 | 1,1 | 1,1 | 1,1 | 1,1 | 1,1 | 1,3 | 3,3 | 2,3 | 1,2 | 2,2 | 1,1 | 1,1 | 1,2 | 2,3 | 1,2 | 1,3 | 1,3 | 1,2 | 1,2 | 1,2 |     |
| 458      | Western    | 1,1                       | 2,3 | 1,1 | 1,1 | 1,1 | 1,1 | 1,1 | 1,1 | 1,1 | 1,1 | 1,3 | 1,1 | 1,1 | 3,3 | 3,3 | 1,3 | 1,1 | 1,1 | 1,1 | 1,2 | 2,2 | 3,3 | 2,2 | 3,3 | 3,3 | 1,3 | 1,2 | 2,2 |     |
| 204      | Western    | 1,1                       | 2,3 | 1,3 | 1,2 | 1,1 | 1,1 | 1,1 | 1,1 | 1,1 | 1,3 | 2,2 | 1,1 | 1,2 | 2,3 | 3,3 | 3,4 | 1,3 | 1,2 | 1,1 | 1,1 | 2,3 | 3,3 | 2,2 | 3,4 | 2,3 | 1,1 | 1,1 | 2,2 |     |
| 205      | Western    | 1,1                       | 2,3 | 1,2 | 1,2 | 1,1 | 1,1 | 1,2 | 1,2 | 1,1 | 1,1 | 2,2 | 1,1 | 1,1 | 2,4 | 3,3 | 1,1 | 1,1 | 1,1 | 1,1 | 1,1 | 2,4 | 1,5 | 1,1 | 1,1 | 1,3 | 2,2 | 1,3 |     |     |
| 206      | Western    | 1,3                       | 1,3 | 1,3 | 1,2 | 1,1 | 1,1 | 1,1 | 1,1 | 1,1 | 1,4 | 1,1 | 1,1 | 1,1 | 2,4 | 1,3 | 1,2 | 1,1 | 1,1 | 1,1 | 1,1 | 1,1 | 1,3 | 2,4 | 1,5 | 1,2 | 1,3 | 1,2 | 1,2 |     |
| 211      | Western    | 1,1                       | 1,2 | 1,2 | 1,2 | 1,1 | 1,1 | 1,2 | 1,2 | 1,1 | 1,3 | 2,2 | 1,1 | 2,2 | 2,2 | 3,3 | 4,4 | 1,3 | 1,1 | 1,1 | 1,2 | 1,3 | 1,3 | 1,2 | 1,4 | 2,2 | 1,1 | 1,2 | 2,4 |     |
| 212      | Western    | 1,2                       | 2,3 | 1,2 | 1,2 | 1,1 | 1,2 | 1,2 | 1,1 | 1,1 | 1,1 | 1,2 | 1,1 | 1,1 | 1,4 | 1,3 | 1,2 | 1,3 | 1,1 | 1,1 | 1,1 | 1,1 | 1,2 | 1,1 | 1,1 | 1,1 | 1,3 | 1,1 | 1,1 |     |
| 459      | Western    | 1,2                       | 1,2 | 3,4 | 1,2 | 1,1 | 1,1 | 1,2 | 2,2 | 1,1 | 1,2 | 1,1 | 1,2 | 1,1 | 2,2 | 2,3 | 1,1 | 1,4 | 1,1 | 1,1 | 1,1 | 1,1 | 1,2 | 1,1 | 1,1 | 2,2 | 1,2 | 1,2 | 1,1 |     |

**Table S1.** Continued.

| Local ID         | Subspecies | Genotype of <i>cTAS2R</i> |     |     |     |     |      |     |     |     |     |     |     |     |     |     |     |     |     |     |     |     |      |       |     |     |     |       |     |
|------------------|------------|---------------------------|-----|-----|-----|-----|------|-----|-----|-----|-----|-----|-----|-----|-----|-----|-----|-----|-----|-----|-----|-----|------|-------|-----|-----|-----|-------|-----|
|                  |            | 1                         | 2   | 3   | 4   | 5   | 7    | 8   | 9   | 10  | 13  | 14  | 16  | 19  | 20  | 30  | 31  | 38  | 39  | 40  | 41  | 42  | 43   | 45    | 46  | 50  | 60  | 62    | 64  |
| 461              | Western    | 1,2                       | 1,2 | 2,3 | 2,2 | 1,1 | 1,2  | 1,1 | 1,1 | 1,1 | 2,3 | 1,2 | 1,2 | 1,1 | 1,4 | 1,3 | 1,2 | 1,1 | 1,1 | 1,1 | 1,1 | 1,4 | 2,2  | 1,1   | 1,1 | 1,1 | 3,3 | 1,1   | 1,1 |
| 456              | Western    | 1,2                       | 1,3 | 3,3 | 2,2 | 1,1 | 1,1  | 1,1 | 1,1 | 1,1 | 1,3 | 1,1 | 1,1 | 1,1 | 1,1 | 3,3 | 2,2 | 1,3 | 1,1 | 1,1 | 1,1 | 1,1 | 1,2  | 1,1   | 1,1 | 1,1 | 2,3 | 1,1   | 1,1 |
| 455              | Western    | 1,1                       | 2,3 | 1,2 | 1,2 | 1,1 | 1,1  | 1,1 | 1,1 | 1,1 | 1,1 | 1,1 | 1,2 | 1,1 | 4,4 | 3,3 | 2,2 | 1,2 | 1,1 | 1,1 | 1,1 | 1,1 | 3,3  | 2,2   | 1,1 | 1,1 | 3,3 | 1,1   | 2,2 |
| 303              | Western    | 1,2                       | 1,1 | 1,3 | 1,2 | 1,1 | 1,2  | 1,1 | 1,1 | 1,1 | 1,1 | 2,3 | 1,1 | 1,1 | 1,3 | 1,3 | 1,3 | 1,2 | 1,2 | 1,1 | 1,1 | 1,2 | 1,3  | 1,2   | 1,3 | 1,3 | 1,3 | 1,2   | 1,2 |
| 307              | Western    | 1,1                       | 3,3 | 1,3 | 1,2 | 1,1 | 1,2  | 1,2 | 1,2 | 1,1 | 1,1 | 2,2 | 1,1 | 1,1 | 4,4 | 3,4 | 1,1 | 1,1 | 1,1 | 1,1 | 1,1 | 1,1 | 4,4  | 5,5   | 1,1 | 1,1 | 2,4 | 1,1   | 3,3 |
| 276              | Western    | 1,1                       | 2,3 | 1,3 | 1,2 | 1,1 | 1,1  | 1,2 | 1,2 | 1,1 | 1,1 | 1,3 | 1,1 | 1,1 | 3,3 | 3,3 | 3,4 | 1,4 | 1,1 | 1,1 | 1,1 | 2,3 | 3,3  | 2,2   | 3,3 | 2,3 | 1,2 | 1,1   | 1,2 |
| 277              | Western    | 1,2                       | 3,3 | 1,1 | 1,1 | 1,2 | 1,1  | 1,4 | 1,1 | 1,1 | 1,1 | 1,2 | 1,1 | 1,1 | 1,4 | 3,3 | 2,2 | 1,1 | 1,1 | 1,1 | 1,1 | 1,1 | 2,2  | 1,1   | 1,2 | 1,1 | 1,1 | 2,4   | 1,1 |
| 278              | Western    | 1,1                       | 1,3 | 1,1 | 1,1 | 1,1 | 1,2  | 1,2 | 1,2 | 1,1 | 1,1 | 2,3 | 1,1 | 1,1 | 1,3 | 3,3 | 2,3 | 1,1 | 1,2 | 1,1 | 1,1 | 1,2 | 2,3  | 1,2   | 1,3 | 1,3 | 1,3 | 2,4   | 1,2 |
| 279              | Western    | 1,1                       | 1,3 | 2,2 | 2,2 | 1,1 | 1,1  | 1,2 | 1,2 | 1,1 | 2,3 | 1,1 | 1,2 | 1,1 | 1,2 | 1,3 | 1,2 | 2,2 | 1,1 | 1,1 | 1,1 | 2,2 | 1,2  | 1,1   | 1,2 | 1,2 | 1,3 | 1,2   | 1,1 |
| 280              | Western    | 1,1                       | 1,3 | 1,1 | 1,1 | 2,2 | 1,1  | 1,2 | 1,2 | 1,1 | 1,3 | 1,2 | 1,2 | 1,1 | 1,4 | 3,3 | 2,2 | 1,2 | 1,2 | 1,1 | 1,1 | 1,1 | 2,3  | 1,2   | 1,5 | 1,1 | 1,2 | 1,2   | 1,2 |
| 281              | Western    | 1,2                       | 3,3 | 1,2 | 1,2 | 1,1 | 1,1  | 1,2 | 1,2 | 1,1 | 1,2 | 1,1 | 1,1 | 1,1 | 2,3 | 1,3 | 1,1 | 1,3 | 1,1 | 1,1 | 1,1 | 1,2 | 1,3  | 1,2   | 1,3 | 2,3 | 1,2 | 1,1   | 1,2 |
| 305              | Western    | 1,2                       | 3,3 | 1,3 | 1,2 | 1,1 | 1,2  | 1,1 | 1,1 | 1,1 | 1,1 | 1,1 | 1,1 | 1,1 | 1,4 | 3,3 | 2,2 | 2,2 | 1,1 | 1,1 | 1,1 | 1,1 | 2,3  | 1,2   | 1,5 | 1,1 | 3,4 | 1,1   | 1,2 |
| 283              | Western    | 1,1                       | 1,2 | 1,3 | 1,2 | 1,1 | 1,2  | 1,1 | 1,1 | 1,1 | 1,3 | 2,2 | 1,1 | 1,1 | 1,1 | 3,3 | 1,2 | 1,1 | 1,2 | 1,1 | 1,1 | 1,4 | 2,4  | 1,5   | 1,1 | 1,1 | 1,2 | 1,1   | 1,3 |
| 201              | Western    | 1,1                       | 3,3 | 1,3 | 1,2 | 1,1 | 1,1  | 1,2 | 1,2 | 1,1 | 1,1 | 1,1 | 1,2 | 1,2 | 2,2 | 1,3 | 1,4 | 1,1 | 1,2 | 1,1 | 1,1 | 1,1 | 1,3  | 1,2   | 1,4 | 2,2 | 1,3 | 1,2   | 1,2 |
| 358              | Western    | 1,2                       | 1,2 | 1,2 | 1,2 | 1,1 | 1,2  | 1,2 | 1,2 | 1,1 | 1,1 | 2,2 | 1,2 | 1,1 | 1,4 | 1,3 | 1,1 | 1,1 | 1,1 | 1,1 | 1,1 | 1,1 | 1,4  | 1,5   | 1,1 | 1,1 | 1,1 | 1,2   | 1,3 |
| 220              | Eastern    | 4,4                       | 2,2 | 5,5 | 3,3 | 1,1 | 3,4  | 1,1 | 1,1 | 1,1 | 1,1 | 1,1 | 3,4 | 3,4 | 5,5 | 3,3 | 1,5 | 2,2 | 1,3 | 1,2 | 3,3 | 1,5 | 6,7  | 1,6   | 1,6 | 5,6 | 5,5 | 5,5   | 1,2 |
| 153              | Eastern    | 4,5                       | 2,4 | 1,6 | 1,1 | 1,1 | 3,5  | 1,1 | 1,1 | 1,3 | 1,1 | 1,5 | 1,3 | 1,3 | 4,5 | 3,3 | 1,2 | 2,5 | 1,1 | 1,1 | 3,3 | 1,6 | 6,7  | 6,7   | 6,7 | 1,5 | 5,6 | 5,6   | 2,4 |
| 140              | Eastern    | 4,6                       | 3,3 | 1,5 | 1,3 | 1,1 | 4,6  | 1,5 | 1,3 | 1,1 | 1,1 | 6,6 | 1,1 | 5,6 | 4,6 | 3,5 | 6,7 | 2,2 | 1,1 | 1,2 | 3,4 | 1,1 | 8,9  | 1,1   | 1,7 | 5,5 | 5,5 | 5,7   | 2,5 |
| 249              | Eastern    | 4,7                       | 3,3 | 1,1 | 1,1 | 1,1 | 1,7  | 1,6 | 1,4 | 1,1 | 1,1 | 1,1 | 1,1 | 4,5 | 5,5 | 3,3 | 1,5 | 2,6 | 1,4 | 1,1 | 3,3 | 5,6 | 7,8  | 1,1   | 1,7 | 6,6 | 5,5 | 5,5   | 1,6 |
| 4                | Eastern    | 7,8                       | 3,3 | 1,5 | 1,4 | 1,1 | 3,6  | 6,6 | 1,5 | 1,1 | 1,1 | 1,1 | 1,3 | 3,5 | 5,5 | 3,3 | 1,1 | 2,2 | 1,4 | 1,1 | 3,3 | 1,6 | 6,8  | 1,6   | 6,7 | 5,6 | 5,5 | 5,8   | 2,6 |
| 182              | Eastern    | 4,5                       | 3,4 | 5,5 | 3,3 | 1,1 | 7,8  | 1,6 | 5,6 | 1,1 | 1,7 | 1,1 | 1,5 | 4,5 | 5,7 | 3,6 | 5,6 | 2,5 | 3,4 | 1,2 | 3,3 | 1,7 | 7,8  | 1,8   | 1,7 | 1,6 | 5,5 | 5,9   | 1,5 |
| 250              | Eastern    | 7,9                       | 3,3 | 1,1 | 1,1 | 1,1 | 1,6  | 1,5 | 1,3 | 1,1 | 1,1 | 1,1 | 1,3 | 5,6 | 4,5 | 3,5 | 1,7 | 2,2 | 1,1 | 1,3 | 3,3 | 1,6 | 8,9  | 1,1   | 1,7 | 5,6 | 5,5 | 5,8   | 6,7 |
| 156              | Eastern    | 4,5                       | 3,3 | 1,7 | 1,1 | 1,1 | 5,6  | 1,6 | 5,5 | 1,3 | 1,1 | 5,5 | 1,3 | 1,1 | 4,4 | 3,3 | 2,2 | 6,6 | 1,1 | 1,1 | 3,3 | 6,6 | 4,4  | 7,7   | 4,4 | 1,1 | 5,5 | 10,10 | 4,4 |
| 147              | Eastern    | 4,9                       | 3,3 | 1,1 | 1,1 | 1,1 | 1,7  | 1,6 | 1,5 | 1,1 | 1,1 | 1,1 | 1,1 | 5,6 | 4,5 | 3,5 | 1,7 | 2,2 | 1,4 | 1,1 | 3,3 | 1,7 | 8,9  | 1,1   | 1,7 | 5,6 | 5,7 | 5,6   | 6,7 |
| 282              | Eastern    | 4,7                       | 2,3 | 1,5 | 1,3 | 1,1 | 3,8  | 1,1 | 1,1 | 4,5 | 1,1 | 1,5 | 1,6 | 4,4 | 4,5 | 3,3 | 1,5 | 2,6 | 1,4 | 1,2 | 3,3 | 5,5 | 7,10 | 1,9   | 1,7 | 6,6 | 5,5 | 7,9   | 1,8 |
| 148              | Central    | 5,6                       | 3,5 | 1,1 | 1,5 | 1,3 | 8,9  | 1,7 | 1,7 | 1,1 | 1,1 | 1,1 | 1,4 | 1,4 | 4,6 | 3,3 | 1,8 | 2,2 | 1,5 | 1,1 | 1,1 | 1,1 | 1,10 | 8,10  | 1,7 | 1,7 | 8,9 | 5,9   | 1,8 |
| 11               | Central    | 10,11                     | 2,2 | 1,5 | 1,6 | 1,1 | 6,8  | 1,6 | 5,5 | 1,1 | 1,1 | 1,1 | 1,1 | 1,7 | 5,6 | 3,5 | 1,8 | 2,2 | 1,6 | 2,4 | 3,3 | 1,8 | 1,11 | 10,10 | 1,7 | 1,1 | 1,9 | 2,5   | 1,6 |
| 150 <sup>b</sup> | NC         | 6,6                       | 2,2 | 1,1 | 1,1 | 1,4 | 6,10 | 5,5 | 8,9 | 1,1 | 8,8 | 7,8 | 1,1 | 6,8 | 3,4 | 3,6 | 1,7 | 2,2 | 7,8 | 1,1 | 1,1 | 7,9 | 7,12 | 1,1   | 1,8 | 3,6 | 3,9 | 5,11  | 1,9 |

<sup>a</sup>The pair of numbers indicates combination of the 2 haplotypes, numbered in GenBank (AB713189–AB713400). *A* indicates the whole gene deletion.

<sup>b</sup>The individual was only maternally identified as a Nigerian-Cameroonian (NC) chimpanzee due to the lack of information about the antecedents in captivity.
