# Supplementary material for: Eco-Geographical Diversification of Bitter Taste Receptor Genes (TAS2Rs) among Subspecies of Chimpanzees (Pan troglodytes)
Source: PubMed Central journal article supplement (PMC3420883; doi:10.1371/journal.pone.0043277), 2012-08-16
Supplement: pone.0043277.s004.pdf [file pone.0043277.s004.pdf]

**Table S2.** Haplotype frequency of each subspecies. Frequencies of non-functional haplotypes (pseudogenes and whole-gene deletions) are underlined.

| Western ( <i>N</i> =92) | Haplotype number |                  |                 |                  |                  |          |   |          |          |          |    |    | Δ        |
|-------------------------|------------------|------------------|-----------------|------------------|------------------|----------|---|----------|----------|----------|----|----|----------|
|                         | 1                | 2                | 3               | 4                | 5                | 6        | 7 | 8        | 9        | 10       | 11 | 12 |          |
| <i>cTAS2R1</i>          | 69 (75 %)        | <u>22 (24 %)</u> | 1 (1 %)         | 0                | 0                | 0        | 0 | 0        | 0        | 0        | 0  | –  | –        |
| <i>cTAS2R2</i>          | 25 (27 %)        | 33 (36 %)        | 34 (37 %)       | 0                | 0                | –        | – | –        | –        | –        | –  | –  | –        |
| <i>cTAS2R3</i>          | 44 (48 %)        | 17 (18 %)        | 30 (33 %)       | 1 (1 %)          | 0                | 0        | 0 | –        | –        | –        | –  | –  | –        |
| <i>cTAS2R4</i>          | 45 (49 %)        | 47 (51 %)        | 0               | 0                | 0                | 0        | – | –        | –        | –        | –  | –  | –        |
| <i>cTAS2R5</i>          | 85 (92 %)        | 7 (8 %)          | 0               | 0                | –                | –        | – | –        | –        | –        | –  | –  | –        |
| <i>cTAS2R7</i>          | 79 (86 %)        | 13 (14 %)        | 0               | 0                | 0                | 0        | 0 | 0        | <u>0</u> | 0        | –  | –  | –        |
| <i>cTAS2R8</i>          | 63 (68 %)        | 25 (27 %)        | 3 (3 %)         | 1 (1 %)          | 0                | 0        | 0 | –        | –        | –        | –  | –  | –        |
| <i>cTAS2R9</i>          | 67 (73 %)        | 25 (27 %)        | 0               | 0                | 0                | 0        | 0 | 0        | 0        | –        | –  | –  | –        |
| <i>cTAS2R10</i>         | 91 (99 %)        | 1 (1 %)          | 0               | 0                | 0                | –        | – | –        | –        | –        | –  | –  | –        |
| <i>cTAS2R13</i>         | 64 (70 %)        | 9 (10 %)         | 12 (13 %)       | 5 (5 %)          | 1 (1 %)          | 1 (1 %)  | 0 | 0        | –        | –        | –  | –  | –        |
| <i>cTAS2R14</i>         | 48 (52 %)        | 33 (36 %)        | 7 (8 %)         | 4 (4 %)          | 0                | 0        | 0 | 0        | –        | –        | –  | –  | –        |
| <i>cTAS2R16</i>         | 77 (84 %)        | 15 (16 %)        | 0               | 0                | 0                | 0        | – | –        | –        | –        | –  | –  | –        |
| <i>cTAS2R19</i>         | 82 (89 %)        | 10 (11 %)        | 0               | 0                | 0                | 0        | 0 | 0        | –        | –        | –  | –  | –        |
| <i>cTAS2R20</i>         | 29 (32 %)        | 23 (25 %)        | 15 (16 %)       | 25 (27 %)        | 0                | 0        | 0 | –        | –        | –        | –  | –  | –        |
| <i>cTAS2R30</i>         | 18 (20 %)        | <u>3 (3 %)</u>   | 70 (76 %)       | 1 (1 %)          | 0                | 0        | – | –        | –        | –        | –  | –  | –        |
| <i>cTAS2R31</i>         | 40 (43 %)        | 32 (35 %)        | <u>9 (10 %)</u> | 11 (12 %)        | 0                | 0        | 0 | 0        | –        | –        | –  | –  | –        |
| <i>cTAS2R38</i>         | <u>64 (70 %)</u> | 19 (21 %)        | <u>6 (7 %)</u>  | 3 (3 %)          | 0                | 0        | – | –        | –        | –        | –  | –  | –        |
| <i>cTAS2R39</i>         | 79 (86 %)        | 13 (14 %)        | 0               | 0                | 0                | 0        | 0 | 0        | –        | –        | –  | –  | –        |
| <i>cTAS2R40</i>         | 92 (100 %)       | 0                | <u>0</u>        | 0                | –                | –        | – | –        | –        | –        | –  | –  | –        |
| <i>cTAS2R41</i>         | 87 (95 %)        | 5 (5 %)          | 0               | 0                | –                | –        | – | –        | –        | –        | –  | –  | –        |
| <i>cTAS2R42</i>         | 64 (70 %)        | <u>17 (18 %)</u> | <u>7 (8 %)</u>  | 4 (4 %)          | <u>0</u>         | <u>0</u> | 0 | <u>0</u> | <u>0</u> | –        | –  | –  | –        |
| <i>cTAS2R43</i>         | 22 (24 %)        | 30 (33 %)        | 27 (29 %)       | <u>11 (12 %)</u> | 2 (2 %)          | <u>0</u> | 0 | 0        | 0        | 0        | 0  | 0  | <u>0</u> |
| <i>cTAS2R45</i>         | 50 (54 %)        | 27 (29 %)        | 1 (1 %)         | 3 (3 %)          | <u>11 (12 %)</u> | 0        | 0 | 0        | 0        | <u>0</u> | –  | –  | –        |
| <i>cTAS2R46</i>         | 62 (67 %)        | 5 (5 %)          | 15 (16 %)       | 6 (7 %)          | 4 (4 %)          | <u>0</u> | 0 | 0        | –        | –        | –  | –  | <u>0</u> |
| <i>cTAS2R50</i>         | 55 (60 %)        | 22 (24 %)        | 14 (15 %)       | 1 (1 %)          | 0                | 0        | 0 | –        | –        | –        | –  | –  | –        |
| <i>cTAS2R60</i>         | 43 (47 %)        | 12 (13 %)        | 33 (36 %)       | 4 (4 %)          | 0                | 0        | 0 | 0        | <u>0</u> | –        | –  | –  | –        |
| <i>cTAS2R62</i>         | 64 (70 %)        | 25 (27 %)        | 1 (1 %)         | 2 (2 %)          | 0                | 0        | 0 | 0        | 0        | 0        | 0  | –  | –        |
| <i>cTAS2R64</i>         | 52 (57 %)        | 26 (28 %)        | 11 (12 %)       | 3 (3 %)          | 0                | 0        | 0 | 0        | 0        | –        | –  | –  | <u>0</u> |

**Table S2.** Continued.

| Eastern ( <i>N</i> =20) | Haplotype number |           |                |          |                 |                 |          |          |          |          |    |    | Δ               |
|-------------------------|------------------|-----------|----------------|----------|-----------------|-----------------|----------|----------|----------|----------|----|----|-----------------|
|                         | 1                | 2         | 3              | 4        | 5               | 6               | 7        | 8        | 9        | 10       | 11 | 12 |                 |
| <i>cTAS2R1</i>          | 0                | <u>0</u>  | 0              | 9 (45 %) | 3 (15 %)        | 1 (5 %)         | 4 (20 %) | 1 (5 %)  | 2 (10 %) | 0        | 0  | –  | –               |
| <i>cTAS2R2</i>          | 0                | 4 (20 %)  | 14 (70 %)      | 2 (10 %) | 0               | –               | –        | –        | –        | –        | –  | –  | –               |
| <i>cTAS2R3</i>          | 11 (55 %)        | 0         | 0              | 0        | 7 (35 %)        | 1 (5 %)         | 1 (5 %)  | –        | –        | –        | –  | –  | –               |
| <i>cTAS2R4</i>          | 13 (65 %)        | 0         | 6 (30 %)       | 1 (5 %)  | 0               | 0               | –        | –        | –        | –        | –  | –  | –               |
| <i>cTAS2R5</i>          | 20 (100 %)       | 0         | 0              | 0        | –               | –               | –        | –        | –        | –        | –  | –  | –               |
| <i>cTAS2R7</i>          | 3 (15 %)         | 0         | 4 (20 %)       | 2 (10 %) | 2 (10 %)        | 4 (20 %)        | 3 (15 %) | 2 (10 %) | <u>0</u> | 0        | –  | –  | –               |
| <i>cTAS2R8</i>          | 12 (60 %)        | 0         | 0              | 0        | 2 (10 %)        | 6 (30 %)        | 0        | –        | –        | –        | –  | –  | –               |
| <i>cTAS2R9</i>          | 11 (55 %)        | 0         | 2 (10 %)       | 1 (5 %)  | 5 (25 %)        | 1 (5 %)         | 0        | 0        | 0        | –        | –  | –  | –               |
| <i>cTAS2R10</i>         | 16 (80 %)        | 0         | 2 (10 %)       | 1 (5 %)  | 1 (5 %)         | –               | –        | –        | –        | –        | –  | –  | –               |
| <i>cTAS2R13</i>         | 19 (95 %)        | 0         | 0              | 0        | 0               | 0               | 1 (5 %)  | 0        | –        | –        | –  | –  | –               |
| <i>cTAS2R14</i>         | 14 (70 %)        | 0         | 0              | 0        | 4 (20 %)        | 2 (10 %)        | 0        | 0        | –        | –        | –  | –  | –               |
| <i>cTAS2R16</i>         | 12 (60 %)        | 0         | 5 (25 %)       | 1 (5 %)  | 1 (5 %)         | 1 (5 %)         | –        | –        | –        | –        | –  | –  | –               |
| <i>cTAS2R19</i>         | 3 (15 %)         | 0         | 3 (15 %)       | 5 (25 %) | 6 (30 %)        | 3 (15 %)        | 0        | 0        | –        | –        | –  | –  | –               |
| <i>cTAS2R20</i>         | 0                | 0         | 0              | 7 (35 %) | 11 (55 %)       | 1 (5 %)         | 1 (5 %)  | –        | –        | –        | –  | –  | –               |
| <i>cTAS2R30</i>         | 0                | <u>0</u>  | 16 (80 %)      | 0        | 3 (15 %)        | 1 (5 %)         | –        | –        | –        | –        | –  | –  | –               |
| <i>cTAS2R31</i>         | 8 (40 %)         | 3 (15 %)  | <u>0</u>       | 0        | 4 (20 %)        | 2 (10 %)        | 3 (15 %) | 0        | –        | –        | –  | –  | –               |
| <i>cTAS2R38</i>         | <u>0</u>         | 14 (70 %) | <u>0</u>       | 0        | 2 (10 %)        | 4 (20 %)        | –        | –        | –        | –        | –  | –  | –               |
| <i>cTAS2R39</i>         | 13 (65 %)        | 0         | 2 (10 %)       | 5 (25 %) | 0               | 0               | 0        | 0        | –        | –        | –  | –  | –               |
| <i>cTAS2R40</i>         | 15 (75 %)        | 4 (20 %)  | <u>1 (5 %)</u> | 0        | –               | –               | –        | –        | –        | –        | –  | –  | –               |
| <i>cTAS2R41</i>         | 0                | 0         | 19 (95 %)      | 1 (5 %)  | –               | –               | –        | –        | –        | –        | –  | –  | –               |
| <i>cTAS2R42</i>         | 8 (40 %)         | <u>0</u>  | <u>0</u>       | 0        | <u>4 (20 %)</u> | <u>6 (30 %)</u> | 2 (10 %) | <u>0</u> | <u>0</u> | –        | –  | –  | –               |
| <i>cTAS2R43</i>         | 0                | 0         | 0              | <u>0</u> | 0               | <u>3 (15 %)</u> | 4 (20 %) | 6 (30 %) | 3 (15 %) | 1 (5 %)  | 0  | 0  | <u>3 (15 %)</u> |
| <i>cTAS2R45</i>         | 12 (60 %)        | 0         | 0              | 0        | <u>0</u>        | 3 (15 %)        | 3 (15 %) | 1 (5 %)  | 1 (5 %)  | <u>0</u> | –  | –  | –               |
| <i>cTAS2R46</i>         | 7 (35 %)         | 0         | 0              | 0        | 0               | <u>3 (15 %)</u> | 7 (35 %) | 0        | –        | –        | –  | –  | <u>3 (15 %)</u> |
| <i>cTAS2R50</i>         | 4 (20 %)         | 0         | 0              | 0        | 7 (35 %)        | 9 (45 %)        | 0        | –        | –        | –        | –  | –  | –               |
| <i>cTAS2R60</i>         | 0                | 0         | 0              | 0        | 18 (90 %)       | 1 (5 %)         | 1 (5 %)  | 0        | <u>0</u> | –        | –  | –  | –               |
| <i>cTAS2R62</i>         | 0                | 0         | 0              | 0        | 10 (50 %)       | 2 (10 %)        | 2 (10 %) | 2 (10 %) | 2 (10 %) | 2 (10 %) | 0  | –  | –               |
| <i>cTAS2R64</i>         | 4 (20 %)         | 4 (20 %)  | 0              | 0        | 2 (10 %)        | 4 (20 %)        | 2 (10 %) | 1 (5 %)  | 0        | –        | –  | –  | <u>3 (15 %)</u> |

**Table S2.** Continued.

| Central (N=4)   | Haplotype number |           |          |          |          |          |          |                 |                 |                 |          |    | Δ        |
|-----------------|------------------|-----------|----------|----------|----------|----------|----------|-----------------|-----------------|-----------------|----------|----|----------|
|                 | 1                | 2         | 3        | 4        | 5        | 6        | 7        | 8               | 9               | 10              | 11       | 12 |          |
| <i>cTAS2R1</i>  | 0                | <u>0</u>  | 0        | 0        | 1 (25 %) | 1 (25 %) | 0        | 0               | 0               | 1 (25 %)        | 1 (25 %) | –  | –        |
| <i>cTAS2R2</i>  | 0                | 2 (50 %)  | 1 (25 %) | 0        | 1 (25 %) | –        | –        | –               | –               | –               | –        | –  | –        |
| <i>cTAS2R3</i>  | 3 (75 %)         | 0         | 0        | 0        | 1 (25 %) | 0        | 0        | –               | –               | –               | –        | –  | –        |
| <i>cTAS2R4</i>  | 2 (50 %)         | 0         | 0        | 0        | 1 (25 %) | 1 (25 %) | –        | –               | –               | –               | –        | –  | –        |
| <i>cTAS2R5</i>  | 3 (75 %)         | 0         | 1 (25 %) | 0        | –        | –        | –        | –               | –               | –               | –        | –  | –        |
| <i>cTAS2R7</i>  | 0                | 0         | 0        | 0        | 0        | 1 (25 %) | 0        | 2 (50 %)        | <u>1 (25 %)</u> | 0               | –        | –  | –        |
| <i>cTAS2R8</i>  | 2 (50 %)         | 0         | 0        | 0        | 0        | 1 (25 %) | 1 (25 %) | –               | –               | –               | –        | –  | –        |
| <i>cTAS2R9</i>  | 1 (25 %)         | 0         | 0        | 0        | 2 (50 %) | 0        | 1 (25 %) | 0               | 0               | –               | –        | –  | –        |
| <i>cTAS2R10</i> | 4 (100 %)        | 0         | 0        | 0        | 0        | –        | –        | –               | –               | –               | –        | –  | –        |
| <i>cTAS2R13</i> | 4 (100 %)        | 0         | 0        | 0        | 0        | 0        | 0        | 0               | –               | –               | –        | –  | –        |
| <i>cTAS2R14</i> | 4 (100 %)        | 0         | 0        | 0        | 0        | 0        | 0        | 0               | –               | –               | –        | –  | –        |
| <i>cTAS2R16</i> | 3 (75 %)         | 0         | 0        | 1 (25 %) | 0        | 0        | –        | –               | –               | –               | –        | –  | –        |
| <i>cTAS2R19</i> | 2 (50 %)         | 0         | 0        | 1 (25 %) | 0        | 0        | 1 (25 %) | 0               | –               | –               | –        | –  | –        |
| <i>cTAS2R20</i> | 0                | 0         | 0        | 1 (25 %) | 1 (25 %) | 2 (50 %) | 0        | –               | –               | –               | –        | –  | –        |
| <i>cTAS2R30</i> | 0                | <u>0</u>  | 3 (75 %) | 0        | 1 (25 %) | 0        | –        | –               | –               | –               | –        | –  | –        |
| <i>cTAS2R31</i> | 2 (50 %)         | 0         | <u>0</u> | 0        | 0        | 0        | 0        | 2 (50 %)        | –               | –               | –        | –  | –        |
| <i>cTAS2R38</i> | <u>0</u>         | 4 (100 %) | <u>0</u> | 0        | 0        | 0        | –        | –               | –               | –               | –        | –  | –        |
| <i>cTAS2R39</i> | 2 (50 %)         | 0         | 0        | 0        | 1 (25 %) | 1 (25 %) | 0        | 0               | –               | –               | –        | –  | –        |
| <i>cTAS2R40</i> | 2 (50 %)         | 1 (25 %)  | <u>0</u> | 1 (25 %) | –        | –        | –        | –               | –               | –               | –        | –  | –        |
| <i>cTAS2R41</i> | 2 (50 %)         | 0         | 2 (50 %) | 0        | –        | –        | –        | –               | –               | –               | –        | –  | –        |
| <i>cTAS2R42</i> | 3 (75 %)         | <u>0</u>  | <u>0</u> | 0        | <u>0</u> | <u>0</u> | 0        | <u>1 (25 %)</u> | <u>0</u>        | –               | –        | –  | –        |
| <i>cTAS2R43</i> | 2 (50 %)         | 0         | 0        | <u>0</u> | 0        | <u>0</u> | 0        | 0               | 0               | 1 (25 %)        | 1 (25 %) | 0  | <u>0</u> |
| <i>cTAS2R45</i> | 0                | 0         | 0        | 0        | <u>0</u> | 0        | 0        | 1 (25 %)        | 0               | <u>3 (75 %)</u> | –        | –  | –        |
| <i>cTAS2R46</i> | 2 (50 %)         | 0         | 0        | 0        | 0        | <u>0</u> | 2 (50 %) | 0               | –               | –               | –        | –  | <u>0</u> |
| <i>cTAS2R50</i> | 3 (75 %)         | 0         | 0        | 0        | 0        | 0        | 1 (25 %) | –               | –               | –               | –        | –  | –        |
| <i>cTAS2R60</i> | 1 (25 %)         | 0         | 0        | 0        | 0        | 0        | 0        | 1 (25 %)        | <u>2 (50 %)</u> | –               | –        | –  | –        |
| <i>cTAS2R62</i> | 0                | 1 (25 %)  | 0        | 0        | 2 (50 %) | 0        | 0        | 0               | 1 (25 %)        | 0               | 0        | –  | –        |
| <i>cTAS2R64</i> | 2 (50 %)         | 0         | 0        | 0        | 0        | 1 (25 %) | 0        | 1 (25 %)        | 0               | –               | –        | –  | <u>0</u> |

**Table S2.** Continued.

| NC <sup>a</sup> (N=2) | Haplotype number |           |          |          |           |           |          |           |                 |          |          |          | Δ        |
|-----------------------|------------------|-----------|----------|----------|-----------|-----------|----------|-----------|-----------------|----------|----------|----------|----------|
|                       | 1                | 2         | 3        | 4        | 5         | 6         | 7        | 8         | 9               | 10       | 11       | 12       |          |
| <i>cTAS2R1</i>        | 0                | <u>0</u>  | 0        | 0        | 0         | 2 (100 %) | 0        | 0         | 0               | 0        | 0        | –        | –        |
| <i>cTAS2R2</i>        | 0                | 2 (100 %) | 0        | 0        | 0         | –         | –        | –         | –               | –        | –        | –        | –        |
| <i>cTAS2R3</i>        | 2 (100 %)        | 0         | 0        | 0        | 0         | 0         | 0        | –         | –               | –        | –        | –        | –        |
| <i>cTAS2R4</i>        | 2 (100 %)        | 0         | 0        | 0        | 0         | 0         | –        | –         | –               | –        | –        | –        | –        |
| <i>cTAS2R5</i>        | 1 (50 %)         | 0         | 0        | 1 (50 %) | –         | –         | –        | –         | –               | –        | –        | –        | –        |
| <i>cTAS2R7</i>        | 0                | 0         | 0        | 0        | 0         | 1 (50 %)  | 0        | 0         | <u>0</u>        | 1 (50 %) | –        | –        | –        |
| <i>cTAS2R8</i>        | 0                | 0         | 0        | 0        | 2 (100 %) | 0         | 0        | –         | –               | –        | –        | –        | –        |
| <i>cTAS2R9</i>        | 0                | 0         | 0        | 0        | 0         | 0         | 0        | 1 (50 %)  | 1 (50 %)        | –        | –        | –        | –        |
| <i>cTAS2R10</i>       | 2 (100 %)        | 0         | 0        | 0        | 0         | –         | –        | –         | –               | –        | –        | –        | –        |
| <i>cTAS2R13</i>       | 0                | 0         | 0        | 0        | 0         | 0         | 0        | 2 (100 %) | –               | –        | –        | –        | –        |
| <i>cTAS2R14</i>       | 0                | 0         | 0        | 0        | 0         | 0         | 1 (50 %) | 1 (50 %)  | –               | –        | –        | –        | –        |
| <i>cTAS2R16</i>       | 2 (100 %)        | 0         | 0        | 0        | 0         | 0         | –        | –         | –               | –        | –        | –        | –        |
| <i>cTAS2R19</i>       | 0                | 0         | 0        | 0        | 0         | 1 (50 %)  | 0        | 1 (50 %)  | –               | –        | –        | –        | –        |
| <i>cTAS2R20</i>       | 0                | 0         | 1 (50 %) | 1 (50 %) | 0         | 0         | 0        | –         | –               | –        | –        | –        | –        |
| <i>cTAS2R30</i>       | 0                | <u>0</u>  | 1 (50 %) | 0        | 0         | 1 (50 %)  | –        | –         | –               | –        | –        | –        | –        |
| <i>cTAS2R31</i>       | 1 (50 %)         | 0         | <u>0</u> | 0        | 0         | 0         | 1 (50 %) | 0         | –               | –        | –        | –        | –        |
| <i>cTAS2R38</i>       | <u>0</u>         | 2 (100 %) | <u>0</u> | 0        | 0         | 0         | –        | –         | –               | –        | –        | –        | –        |
| <i>cTAS2R39</i>       | 0                | 0         | 0        | 0        | 0         | 0         | 1 (50 %) | 1 (50 %)  | –               | –        | –        | –        | –        |
| <i>cTAS2R40</i>       | 2 (100 %)        | 0         | <u>0</u> | 0        | –         | –         | –        | –         | –               | –        | –        | –        | –        |
| <i>cTAS2R41</i>       | 2 (100 %)        | 0         | 0        | 0        | –         | –         | –        | –         | –               | –        | –        | –        | –        |
| <i>cTAS2R42</i>       | 0                | <u>0</u>  | <u>0</u> | 0        | <u>0</u>  | <u>0</u>  | 1 (50 %) | <u>0</u>  | <u>1 (50 %)</u> | –        | –        | –        | –        |
| <i>cTAS2R43</i>       | 0                | 0         | 0        | <u>0</u> | 0         | <u>0</u>  | 1 (50 %) | 0         | 0               | 0        | 0        | 1 (50 %) | <u>0</u> |
| <i>cTAS2R45</i>       | 2 (100 %)        | 0         | 0        | 0        | <u>0</u>  | 0         | 0        | 0         | 0               | <u>0</u> | –        | –        | –        |
| <i>cTAS2R46</i>       | 1 (50 %)         | 0         | 0        | 0        | 0         | <u>0</u>  | 0        | 1 (50 %)  | –               | –        | –        | –        | <u>0</u> |
| <i>cTAS2R50</i>       | 0                | 0         | 1 (50 %) | 0        | 0         | 1 (50 %)  | 0        | –         | –               | –        | –        | –        | –        |
| <i>cTAS2R60</i>       | 0                | 0         | 1 (50 %) | 0        | 0         | 0         | 0        | 0         | <u>1 (50 %)</u> | –        | –        | –        | –        |
| <i>cTAS2R62</i>       | 0                | 0         | 0        | 0        | 1 (50 %)  | 0         | 0        | 0         | 0               | 0        | 1 (50 %) | –        | –        |
| <i>cTAS2R64</i>       | 1 (50 %)         | 0         | 0        | 0        | 0         | 0         | 0        | 0         | 1 (50 %)        | –        | –        | –        | <u>0</u> |

<sup>a</sup>Subspecies of a Nigerian-Cameroonian (NC) chimpanzee was identified only maternally due to a lack of information about the antecedents in captivity.
