# Supplementary material for: Eco-Geographical Diversification of Bitter Taste Receptor Genes (TAS2Rs) among Subspecies of Chimpanzees (Pan troglodytes)
Source: PubMed Central journal article supplement (PMC3420883; doi:10.1371/journal.pone.0043277), 2012-08-16
Supplement: pone.0043277.s006.pdf [file pone.0043277.s006.pdf]

**Table S4.** PCR primers used in this study. These primers were designed based on CGSC 2.1.3/panTro3.

| Locus           | Forward primer |                               | Reverse primer |                                    |
|-----------------|----------------|-------------------------------|----------------|------------------------------------|
|                 | Name           | Sequence                      | Name           | Sequence                           |
| <i>cTAS2R9</i>  | cTAS2R9_F      | 5'-TTGTGCAAATTTAAGAAATCAG-3'  | cTAS2R9_R      | 5'-AAGGAACACAAAACAAATCTTC-3'       |
| <i>cTAS2R31</i> | cTAS2R31_F     | 5'-TTGTCCTTTCTCTCTTCTCAAT-3'  | cTAS2R31_R     | 5'-GAGCATGTTATTGTCAATGTTC-3'       |
| <i>cTAS2R42</i> | cTAS2R42_F     | 5'-GCATCCCTTAGTAGATCTTTTG-3'  | cTAS2R42_R     | 5'-CCTGGTAGGATTTTCATTTATGT-3'      |
| <i>cTAS2R50</i> | cTAS2R50_F     | 5'-AGAATGTTACTGCACATTCAGA-3'  | cTAS2R50_R     | 5'-TCTATAATTTGGCATCTTGTGA-3'       |
| <i>IntA</i>     | intA_F         | 5'-GATAATTTTGTTGAGGCATAAAG-3' | intA_R         | 5'-TTTTCAAAGCACTAGAGTTAAGG-3'      |
| <i>IntB</i>     | intB_F         | 5'-TGTCAGATGTGTAGATTGAAAAA-3' | intB_R         | 5'-AACTTGTCTCTCTAGTTGGTTCA-3'      |
| <i>IntC</i>     | intC_F         | 5'-GAGGAATTATCAAGAGGAAAAAT-3' | intC_R         | 5'-TTTATTGTGGAGCATAACATACA-3'      |
| <i>Int31-63</i> | —              | —                             | int31-63_R     | 5'-GACGAGTAATAATAATTTCTATGAGATA-3' |
